# Supplementary material
Source: publisher figshare collection journal article supplement (https://diabetesjournals.figshare.com/ndownloader/files/30929662)
Supplement: Supplementary file 1 [file 30929662]

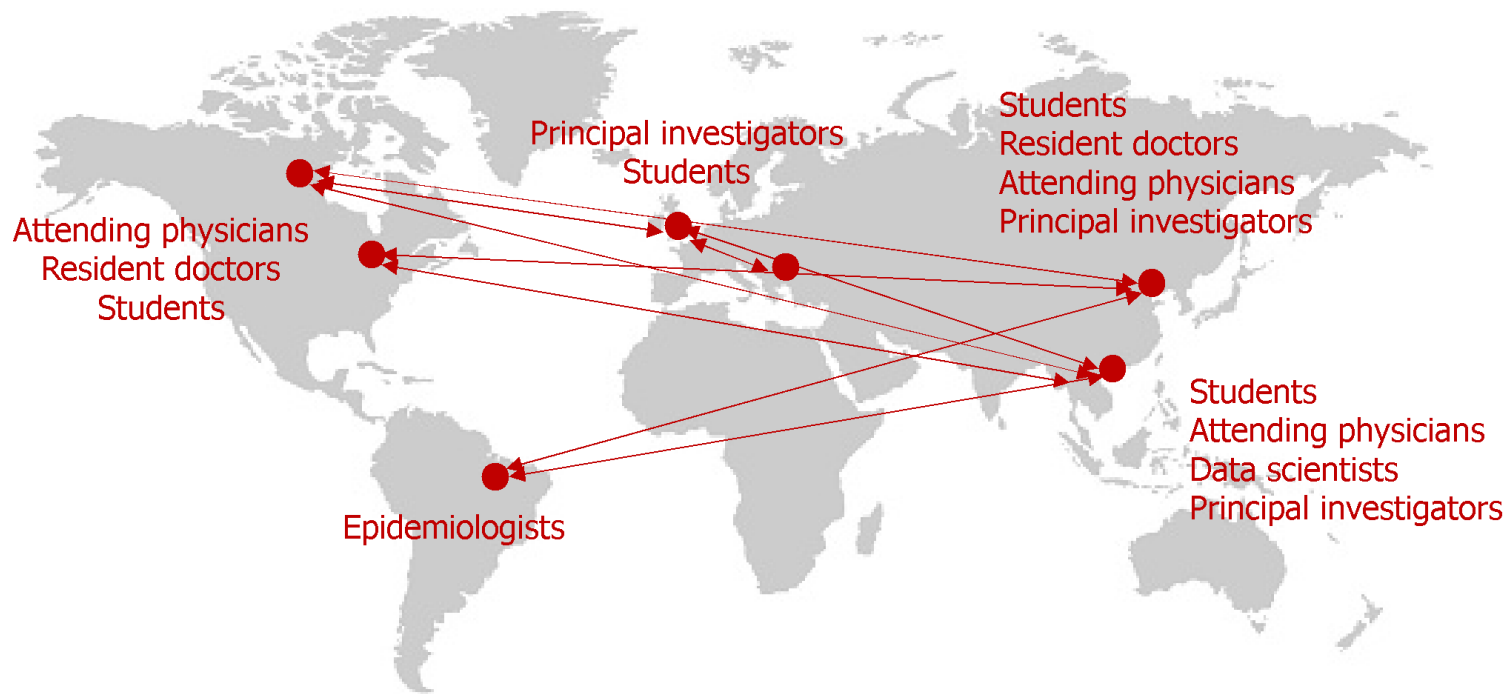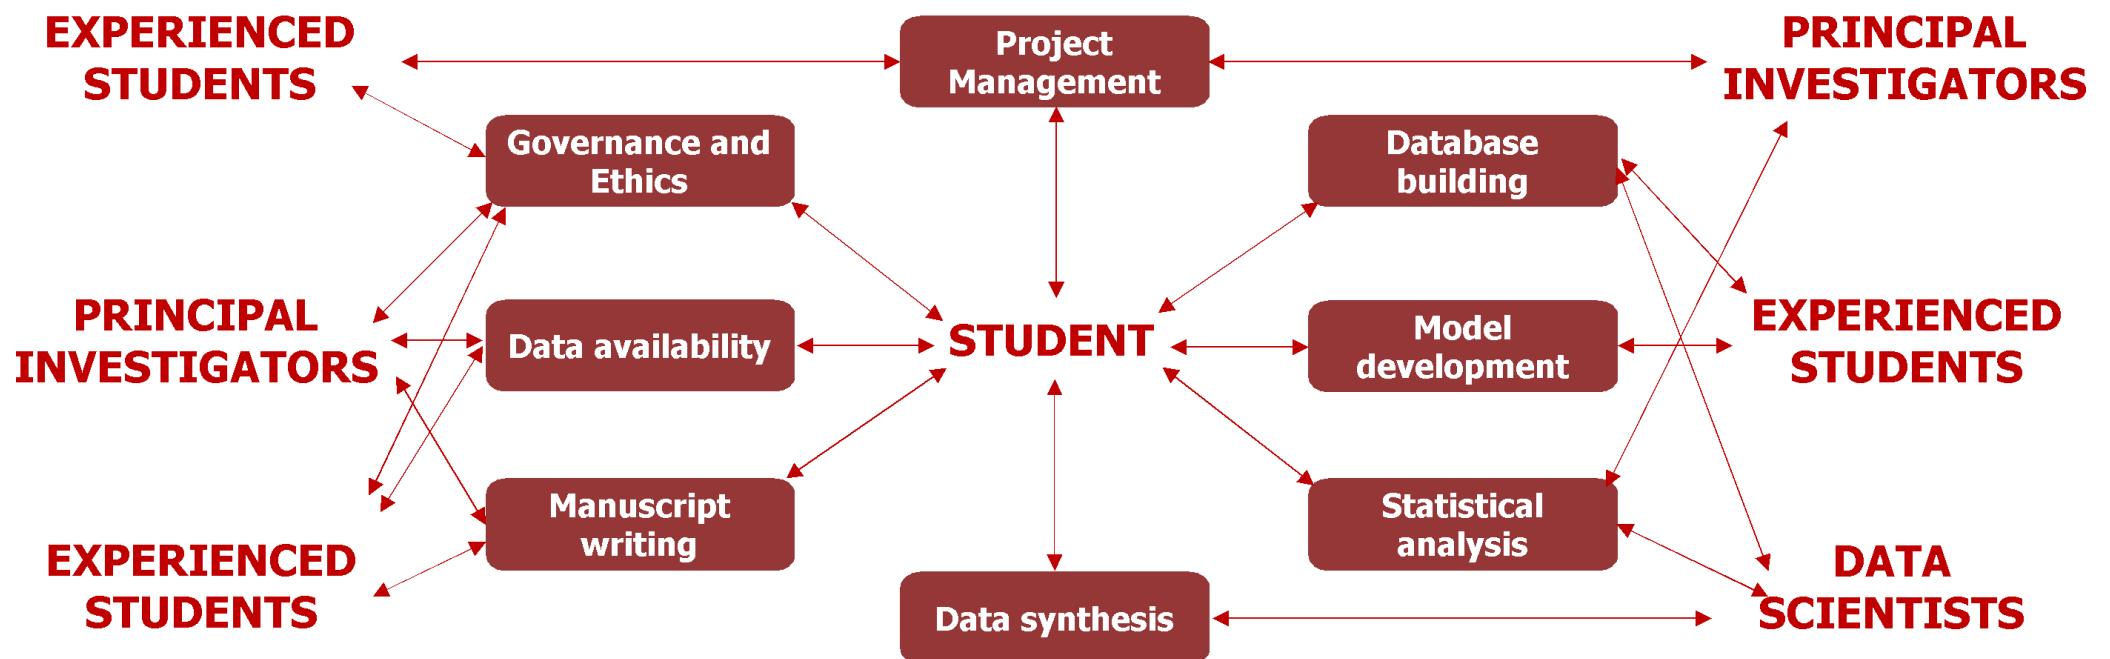

**Supplementary Figure 1.** Distributed global network of junior and senior investigators (*top panel*). Accessibility is enhanced by interactions between group members and principal investigators (*bottom panel*). This system allows gender equity to be achieved by breaking down institutional barriers and provides support and opportunities for students with no prior experience to enter cardiovascular research. Copyright by Cardiovascular Analytics Group 2021 (<https://www.cardiovascularanalyticsgroup.co.uk/>). Reproduced here with permission.
